# Supplementary material for: In Situ Indoor Air Volatile Organic Compounds Assessment in a Car Factory Painting Line
Source: MDPI journal article supplement (doi:10.3390/pr11082259), 2023-07-27
Supplement: s1 [file s1]

| #  | VOCs           | Locations          |          |                   |          |                    |          |                 |          |                     |          |                 |          |                 |          |               |          |
|----|----------------|--------------------|----------|-------------------|----------|--------------------|----------|-----------------|----------|---------------------|----------|-----------------|----------|-----------------|----------|---------------|----------|
|    |                | Phosphatising Bath |          | Cataphoresis Bath |          | Primer Application |          | Ink Application |          | Varnish Application |          | Wax Application |          | Factory Ceiling |          | Head's Office |          |
|    |                | <i>R. I.</i>       | $\sigma$ | <i>R. I.</i>      | $\sigma$ | <i>R. I.</i>       | $\sigma$ | <i>R. I.</i>    | $\sigma$ | <i>R. I.</i>        | $\sigma$ | <i>R. I.</i>    | $\sigma$ | <i>R. I.</i>    | $\sigma$ | <i>R. I.</i>  | $\sigma$ |
| 1  | Ethanol        | 2,99               | ±0,81    | 3,74              | ±1,49    | 5,13               | ±2,88    | 9,97            | ±4,00    | 5,97                | ±1,73    | 5,43            | ±2,02    | 4,56            | ±1,12    | 5,25          | ±0,87    |
| 2  | 2-Propanol     | 1,27               | ±0,54    | 1,43              | ±0,72    | 1,72               | ±0,94    | 1,44            | ±0,71    | 1,68                | ±0,79    | 1,34            | ±0,55    | 1,54            | ±0,59    | 0,58          | ±0,20    |
| 3  | Propanal       | 1,09               | ±0,43    | 1,34              | ±0,60    | 1,47               | ±0,79    | 1,22            | ±0,44    | 1,39                | ±0,62    | 1,19            | ±0,46    | 1,22            | ±0,46    | 0,59          | ±0,15    |
| 4  | Acetone        | 1,49               | ±0,39    | 1,52              | ±0,49    | 1,40               | ±0,48    | 1,75            | ±0,49    | 1,43                | ±0,46    | 2,25            | ±1,09    | 2,36            | ±0,89    | 3,46          | ±2,91    |
| 5  | 1-Propanol     | 0,42               | ±0,37    | 0,73              | ±0,61    | 1,23               | ±1,23    | 0,73            | ±0,65    | 0,75                | ±0,70    | 0,76            | ±0,71    | 0,65            | ±0,53    | 0,17          | ±0,10    |
| 6  | Butanal        | 1,06               | ±0,42    | 1,18              | ±0,52    | 1,24               | ±0,64    | 0,92            | ±0,37    | 1,14                | ±0,52    | 1,13            | ±0,46    | 1,30            | ±0,45    | 0,53          | ±0,18    |
| 7  | Isobutanol     | 0,87               | ±0,41    | 1,07              | ±0,58    | 1,37               | ±0,77    | 1,23            | ±0,54    | 1,11                | ±0,53    | 1,10            | ±0,56    | 0,98            | ±0,46    | 0,58          | ±0,23    |
| 8  | Acetic Acid    | 1,03               | ±0,14    | 1,46              | ±0,39    | 1,76               | ±0,61    | 2,84            | ±0,55    | 1,71                | ±0,37    | 1,80            | ±0,26    | 1,32            | ±0,27    | 1,08          | ±0,08    |
| 9  | Benzene        | 1,04               | ±0,32    | 1,22              | ±0,47    | 1,46               | ±0,66    | 0,95            | ±0,36    | 1,20                | ±0,42    | 1,11            | ±0,39    | 0,92            | ±0,33    | 0,38          | ±0,11    |
| 10 | 2-Butanone     | 8,02               | ±2,33    | 9,50              | ±2,15    | 20,66              | ±7,06    | 20,68           | ±7,66    | 20,23               | ±3,18    | 9,94            | ±5,18    | 13,28           | ±3,83    | 15,53         | ±2,24    |
| 11 | 1-Butanol      | 6,80               | ±1,92    | 2,43              | ±0,41    | 8,06               | ±1,62    | 12,93           | ±9,00    | 11,55               | ±3,11    | 4,77            | ±1,46    | 5,23            | ±1,22    | 2,36          | ±0,38    |
| 12 | Pentanal       | 1,89               | ±0,42    | 1,19              | ±0,19    | 2,91               | ±1,04    | 6,08            | ±3,83    | 3,58                | ±0,65    | 1,69            | ±0,39    | 1,82            | ±0,41    | 1,27          | ±0,21    |
| 13 | Propanoic Acid | 1,88               | ±0,47    | 1,59              | ±0,39    | 1,40               | ±0,52    | 2,57            | ±0,69    | 1,52                | ±0,38    | 1,94            | ±0,35    | 4,41            | ±1,60    | 1,54          | ±0,33    |
| 14 | Hexanal        | 0,70               | ±0,29    | 0,55              | ±0,26    | 0,28               | ±0,14    | 0,20            | ±0,09    | 0,25                | ±0,11    | 0,66            | ±0,42    | 0,53            | ±0,24    | 0,62          | ±0,29    |
| 15 | 2-Hexanone     | 1,48               | ±0,25    | 1,07              | ±0,16    | 1,01               | ±0,12    | 1,21            | ±0,19    | 1,08                | ±0,17    | 1,67            | ±0,34    | 1,59            | ±0,40    | 3,75          | ±1,14    |
| 16 | N.I.           | 1,46               | ±0,69    | 0,88              | ±0,45    | 0,63               | ±0,33    | 0,91            | ±0,34    | 0,85                | ±0,48    | 1,15            | ±0,48    | 1,23            | ±0,45    | 0,59          | ±0,22    |
| 17 | N.I.           | 0,94               | ±0,12    | 1,15              | ±0,21    | 1,05               | ±0,24    | 0,79            | ±0,15    | 1,08                | ±0,22    | 1,10            | ±0,19    | 1,06            | ±0,16    | 0,94          | ±0,18    |
| 18 | N.I.           | 0,58               | ±0,22    | 0,81              | ±0,29    | 0,94               | ±0,43    | 0,75            | ±0,27    | 0,80                | ±0,32    | 0,84            | ±0,27    | 0,75            | ±0,25    | 0,25          | ±0,05    |
| 19 | N.I.           | 0,58               | ±0,29    | 0,94              | ±0,48    | 1,34               | ±0,84    | 1,12            | ±0,53    | 0,97                | ±0,53    | 0,99            | ±0,46    | 0,76            | ±0,37    | 0,22          | ±0,08    |
| 20 | N.I.           | 1,46               | ±0,60    | 2,22              | ±0,91    | 1,40               | ±0,66    | 1,49            | ±0,75    | 2,24                | ±1,13    | 2,10            | ±0,66    | 1,81            | ±0,74    | 0,71          | ±0,21    |
| 21 | N.I.           | 5,62               | ±1,25    | 5,81              | ±1,17    | 7,67               | ±2,88    | 10,67           | ±2,79    | 7,58                | ±1,41    | 6,71            | ±1,66    | 6,36            | ±1,38    | 6,12          | ±1,08    |
| 22 | N.I.           | 2,86               | ±0,85    | 2,73              | ±0,74    | 6,11               | ±3,31    | 9,05            | ±2,98    | 6,58                | ±1,35    | 3,98            | ±1,69    | 4,50            | ±1,74    | 5,45          | ±0,94    |
| 23 | N.I.           | 11,33              | ±6,46    | 1,75              | ±0,93    | 12,16              | ±7,72    | 59,93           | ±90,75   | 23,06               | ±20,12   | 6,78            | ±5,61    | 6,22            | ±4,99    | 1,61          | ±0,84    |
| 24 | N.I.           | 5,37               | ±1,41    | 2,09              | ±0,39    | 7,39               | ±0,68    | 8,98            | ±3,82    | 8,79                | ±1,34    | 3,06            | ±0,88    | 4,89            | ±0,79    | 2,42          | ±0,50    |
| 25 | N.I.           | 1,62               | ±0,85    | 1,28              | ±0,63    | 1,06               | ±0,72    | 1,02            | ±0,91    | 1,26                | ±0,97    | 1,69            | ±1,10    | 1,98            | ±1,13    | 1,93          | ±0,85    |
| 26 | N.I.           | 2,49               | ±2,55    | 1,69              | ±1,09    | 1,51               | ±1,05    | 2,55            | ±1,74    | 2,08                | ±2,08    | 3,03            | ±2,73    | 4,91            | ±4,91    | 24,65         | ±10,64   |
